# Supplementary material for: Inter-comparison of O 2 /N 2 Ratio Scales Among AIST, NIES, TU, and SIO Based on Round-Robin Using Gravimetric Standard Mixtures
Source: Copernicus journal article supplement (doi:10.5194/amt-2020-481), 2021-01-06
Supplement: Supplementary file [file amt-2020-481-AC2-supplement.pdf]

1 RC1: 'Comment on amt-2020-481', Anonymous Referee #1, 21 Mar 2021

2

3 **General comments:**

4 Language: in some places the English writing could be improved, I have listed some  
5 suggestions in the detailed comments below.

6

7 Abstract: the abstract would benefit for having a number to represent the differences in  
8 precision between the laboratories, next to the offsets. The span offsets given in % are not  
9 directly clear, and it would be helpful if they could be expressed differently. It is also not clear  
10 from the abstract how this span offsets leads to a value of 0.29 PgC/yr in the carbon budget,  
11 and in which direction the shift is. It would be good to elaborate on this. It would be helpful  
12 to specify what the term zero offsets represents, so that the abstract is easier to read without  
13 reading the manuscript first. It would be good to include a quantification of the comparison  
14 of the 2 records at HAT in the final sentence. The “temporal drift” in line 21 could also be  
15 further explained, e.g. with details on the time period.

16 **Response:** The description about the offsets was revised in overall to be able to understand  
17 what the value is (p1, L25-L28). We simply described how to estimate a value of 0.29 PgC/yr.  
18 But this value was update and revised to 0.30PgC/yr. The words of “zero offsets” was revised  
19 to “deviations in the measured  $\delta$  (O<sub>2</sub>/N<sub>2</sub>) values on laboratories’ scales” (p1, L28). A result  
20 of the comparison of the 2 records at HAT was added in the final sentence(p2, L1-L2). Time  
21 period was added to the “temporal drift”(p1, L23).

22

23 Page 3, lines 25-28: it is not fully clear to me how the correction for the expansion rates are  
24 applied and how these are measured.

25 **Response:** We cleared how the correction for the expansion rates are applied and how the  
26 rates are measured. (p4, L8-L12)

27

28 Page 4, line 10: it would be good to add information on the choice of the range, it seems quite  
29 a large range in comparison to observed values.

30 **Response:** We selected a large range in comparison to observed values in order to evaluate the  
31 difference of the respective span sensitivities accurately. We added the information on the  
32 choice of range. (p4, L24-L25)

33

34 Page 5, line 3: how are these values determined? (5000, 1000, 500 times).

35 **Response:** The values were calculated based on the abundances of <sup>17</sup>O<sup>17</sup>O and <sup>17</sup>O<sup>16</sup>O, <sup>18</sup>O<sup>18</sup>O  
36 and <sup>18</sup>O<sup>16</sup>O, and <sup>15</sup>N<sup>15</sup>N and <sup>15</sup>N<sup>14</sup>N. We added to the sentence about the calculation. (P5,

1 L21)

2

3 Page 5, line 28: what is sufficiently small?

4 **Response:** We revised the sentence to “sufficiently smaller than those of  $^{17}\text{O}^{16}\text{O}$ ,  $^{18}\text{O}^{16}\text{O}$ , and  
5  $^{15}\text{N}^{15}\text{N}$ ”. (P6, L20-21)

6

7 Page 6, line 13: why are these values constant?

8 **Response:** We added why these values are constant. (P7, L6-L7)

9

10 Page 7, line 2: can the authors also provide the long-term stability for the other labs?

11 **Response:** Because the long-term stability of NIES and AIST already described, the stability  
12 of SIO and TU were added. (TU: P8, L5-L7, SIO: P8, L28-P9,1)

13

14 Page 7, line 27: it would be good to explain that the SIO scale is defined to be 0 per meg,  
15 because it is used internationally.

16 **Response:** We added the sentence of “of which scale is defined as  $\delta(\text{O}_2/\text{N}_2) = 0$ ”. (P8, L26)

17

18 Page 9, line 11: (and other places in the text): what does the “expanded uncertainty”  
19 represent?

20 **Response:** We explained the expanded uncertainty in text (P10, L14-L16).

21 Expanded uncertainty (U) was represented using standard uncertainty (u) and coverage  
22 factor (k) by the following equation,

23 
$$U = ku$$

24 We used the coverage factor of 2(k=2) which means  $\approx$  a 95% level of confidence.

25

26 Page 9, line 14: this seems a large drift in a couple of years' time, so “slightly” might not be  
27 the appropriate word here. The explanations for the drift because of the oxidation inside the  
28 cylinders seems to be different for each cylinders, are the corrections made for each cylinder  
29 separately? Are these the regular cylinders, also used for maintaining the NMJI/AIST scale?  
30 Or is this only used for the round-robins?

31 **Response:** We removed “slightly” and explained that the corrections for each cylinder were  
32 performed separately (P10, L19, L28). We used cylinders having inner wall treated for storing  
33 O<sub>2</sub> standard gases. NIES and EMRI/AIST also use same type of cylinders.

34

35 Page 9, line 32: Where do we see the long-term drift of each laboratory's scale?

36 **Response:** The sentence about the long-term stabilities of each laboratory's scale were added

1 in section 2.3 (EMRI/AIST:p6, L8-L9, NIES:p7,L26-L27, TU: p8,L5-L7, SIO: p8, L28-p9,  
2 L1).

3

4 Page 10, line 10: what do these percentages represent?

5 **Response:** These percentages represent relative deviation from span sensitivity of the  
6 NMIJ/AIST scale. We revised the sentence. (P11, L19-20)

7

8 Page 10, line 12: could you elaborate on the filling years?

9 **Response:** We revised this sentence in overall. (P11, L23-L24)

10

11 Page 10, line 16: how are the results consistent with the GOLLUM program? Can this be  
12 quantified?

13 **Response:** Our results were consistent with those of the GOLLIM program within uncertainty.  
14 We add the words of “within their uncertainty”. (P11, L28-L29)

15

16 Page 10, line 17: could you quantify “slightly bigger”?

17 **Response:** This sentence was removed. (P11, L29)

18

19 Page 10, line 22: can you quantify how this study shows that the labs can be compared?

20 **Response:** We revised “shows” to “aims”. (P12, L5)

21

22 Page 10, line 25: how was it confirmed that the isotope ratios did not differ significantly?

23 **Response:** We add some sentences to get good understanding of this part. (P12, L8-L12)

24

25

26 Page 10, line 29: why not both against the SIO scale?

27 **Response:** We understand the SIO scale is internationally used. But purpose of this  
28 manuscript is the comparison between individual laboratories’ scale values and gravimetric  
29 values directly. Therefore, we discussed NIES and EMRI/AIST scales based on NMIJ/AIST  
30 scale.

31

32 Page 11, line 2: how is the value of -6.6 per meg derived, and should it be compared to the  
33 goal of intercompatibility of 5 per meg?

34 **Response:** We revised the sentence according your comments. (P12, L22-L25)

35

36 Page 11, lines 16-20: the GCB paper has been updated in the meantime twice, and it would

1 be best to use the numbers from Friedlingstein et al. 2020. Line 18 does not seem to be a full  
2 sentence and it is not clear to me what the 0.29 PgC/yr correction is (e.g. from land to ocean,  
3 or the other way around?). Table 5: it would be good to add the numbers from Friedlingstein  
4 et al. 2020 in the table for reference.

5 **Response:** We updated our data using the numbers from Friedlingstein et al. 2020 and the  
6 sentence about the 0.29 PgC/yr correction was revised. (P13, L7-L8)

7  
8 Page 11, line 30: “first time in the world”: what is the first time in the world? The GOLLUM  
9 program is also an intercomparison program between laboratories.

10 **Response:** Because the span sensitivities of the respective laboratories are not compared in  
11 the GOLLUM program, quantifying respective span sensitivities is performed the first time  
12 in the world in this study.

13  
14 Page 11, line 31: rewrite the 0.29 PgC/yr, to be more specific what the number means. See  
15 comment above.

16 **Response:** We revised the sentence in overall. (P13, L24-L25)

17  
18 Page 12, line 3: what does “other four” mean in comparison to the GOLLUM program?

19 **Response:** We used five round-robin cylinders and “other four” mean four cylinders in the  
20 five cylinders. (P13, L27-L28)

21  
22 Page 12, lines 4-6: it would be good to be more specific here on the implications, rather than  
23 repeating the causes for the decrease.

24 **Response:** We described the implications in the sentence according to your comment. (P13,  
25 L29-p14,L1)

26  
27 Page 12, line 11: can you quantify the bias?

28 **Response:** We add the value of the bias. (P14, L6)

29  
30 Page 12, lines 11-12: how do the results improve the carbon budget and OHC increase?

31 **Response:** We added the sentence about improvement of the carbon budget and OHC  
32 increase. (P14, L7-L8)

33  
34 Conclusions: it would be useful to include an outlook. Will this intercomparison continue in  
35 the future? Will other laboratories be invited to participate?

36 **Response:** We added an outlook in end of the conclusions. (P14, L8-L11)

1  
2 Table 1: can the authors add more information about the expansion rates? What is meant with  
3 the standard uncertainty?

4 **Response:** We add more information about the expansion rate. We explained that the standard  
5 uncertainty was calculated according to the law of propagation of uncertainties.

6  
7 Figure 2: what is on the x axis?

8 **Response:** We revised the x axis which represent gravimetric values.

9  
10 Table 3: how is the standard uncertainty determined?

11 **Response:** We added how the standard uncertainty is determined.

12  
13 Figure 3: should the y-axis in panel a read NMJI/AIST instead of grav? Maybe also include  
14 the average residuals to compare lab precisions?

15 **Response:** This figure represents the relation of the gravimetric values and the measured  
16 values. We revised the caption.

17  
18 Figure 4: maybe add a panel with the differences/bias? Why not on the Scripps scale? It would  
19 be good to include in the caption that these are duplicate samples, not measurements of the  
20 same flasks.

21 **Response:** The difference values were added in figure 4. We described that these are duplicate  
22 samples. We explained why not on the Scripps scale in previous part.

23  
24 Table 5: change to Friedlingstein et al. 2020 (see comment above), and add numbers for  
25 comparison. Which numbers are Tohjima et al. 2019? Rewrite “changing rate”.

26 **Response:** We changed values of fossil fuel and atmospheric CO<sub>2</sub> to Friedlingstein et al. 2020  
27 and revised the footnotes.

28  
29 Detailed comments:

30 Page 2

31 Line 2: “molar fraction” could be changed to “mole fraction”, which is more commonly used  
32 in the field, throughout the text.

33 **Response:** We understand that “mole fraction” is more commonly used in the field. But we  
34 should use “molar fraction” because derived quantities should be defined by quantities and  
35 not by units (mole is a unit). Angles can be defined as ‘length ratios’ and not as ‘meter ratios’.  
36 A mass fraction is not called gram fraction either.

1

2 Line 3: explain “some” stoichiometric ratios.

3 **Response:** We revised from “some” to “distinct”. (P2, L7)

4

5 Lines 2-5: references to earlier studies would be appropriate here.

6 **Response:** We added references of earlier studies. (P2, L6-L8)

7

8 Line 6: “changes” should be “measurements”.

9 **Response:** ”change in” was revised to “measurements of ”. (P2, L10)

10

11 Line 11: rewrite “the ocean uptakes”

12 **Response:** We revised to “the ocean uptakes takes in more than 90% of the Earth's excess

13 energy evaluated based on ocean temperature measurements using Argo floats” (P2, L15-17)

14

15 Line 14: “precision” -> “precise” and rewrite micro-mole-per-mole

16 **Response:** “precision” -> “precise” (P2, L18)

17

18 Line 27: “per meg” instead of “per meg units”

19 **Response:** we revised from “per meg” to “per meg units” (P3, L2)

20

21 Page 3

22 Line 6: “remain”?

23 **Response:** We revised the sentence. (P3, L16)

24

25 Line 22: explain “round-robin”

26 **Response:** We add the explanation of round-robin in introduction. (P3, L25-26)

27

28 Page 4

29 Line 6: “hereafter the” -> “hereafter called the”

30 **Response:** we revised from “hereafter the” to “hereafter called the” (P4, L20-L21)

31

32 Line 24: why are the Ar values much more variable compared to tropospheric air?

33 **Response:** We revised the sentence because the “variable” is wrong. (P5, L10)

34

35

36 Page 7

- 1 Line 10: what is meant with “unequal to”?
- 2 **Response:** We revised it to “not equivalent to”. (P8, L9)
- 3
- 4 Page 8
- 5 Lines 5-8: the sensitivity factor and interference factors could be further explained to be
- 6 clearer.
- 7 **Response:** We explained the sensitivity factor and interference. (P9, L11-12)
- 8
- 9 Page 9
- 10 Line 1: what are “changing rates”?
- 11 **Response:** The changing rates represent change speed of  $\delta$  ( $O_2/N_2$ ). We revised the sentence
- 12 a little. (P10, L7-8)
- 13
- 14 Lines 29-30: what is meant here by selecting mixtures from the round-robins?
- 15 **Response:** We removed the sentence. (P11, L5)
- 16
- 17 Page 10:
- 18 Line 5: rewrite “Figure 3a plots”
- 19 **Response:** We revised to “Figure 3a represents”. (P11, L14)
- 20
- 21 Page 11
- 22 Line 10: “corrected” -> “improved”?
- 23 **Response:** We revised from “corrected” to “improved”. (P12, L29)
- 24
- 25 Line 13: rewrite “secular changing rate”
- 26 **Response:** We revised to the average changing rate of atmospheric  $O_2/N_2$  ratio and  $CO_2$  molar
- 27 fraction reported on the NIES scale. (P13, L3)
